# Supplementary material for: Room-temperature random lasing of metal-halide perovskites via morphology-controlled synthesis
Source: Royal Society of Chemistry journal article supplement (doi:10.1039/d0na00794c), 2020-01-01
Supplement: d0na00794c1.pdf [file d0na00794c1.pdf]

## **Supplementary Information**

# **Room-temperature Random Lasing of Metal-halide Perovskites via Morphology-controlled Synthesis**

**Yu-Heng Hong and Tsung Sheng Kao\***

*Department of Photonics and Institute of Electro-Optical Engineering, College of Electrical and Computer Engineering, National Chiao Tung University, Hsinchu 30050, Taiwan*

E-mail address: [tskao@nctu.edu.tw](mailto:tskao@nctu.edu.tw)

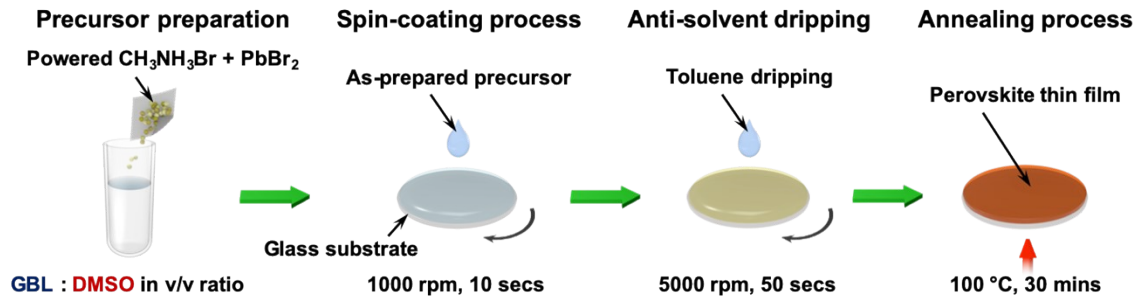

**Fig. S1. Schematic diagram of fabrication. The  $\text{MAPbBr}_3$  perovskite thin films are prepared *via* the method of solvent engineering along with an anti-solvent dripping technique.**

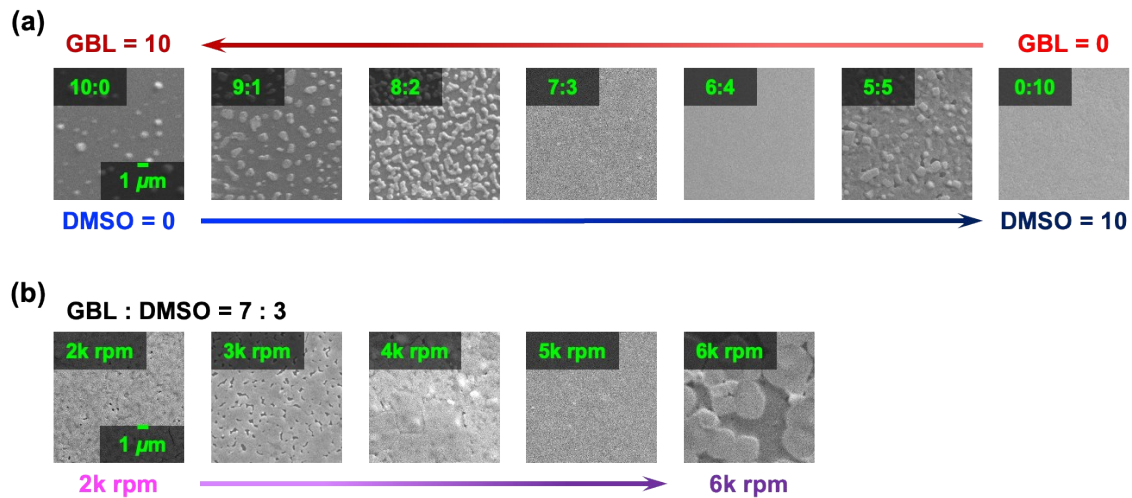

Fig. S2. Top-view SEM images with different processing parameters. (a) Synthesized  $\text{MAPbBr}_3$  thin films with different solvent mixtures. (b) Synthesized  $\text{MAPbBr}_3$  thin films at the volume ratio of 7:3 with different revolutions per minute (rpm).

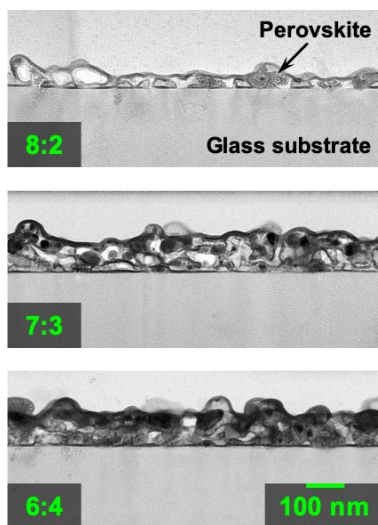

**Fig. S3. Cross-section TEM images with different solvent mixtures.**

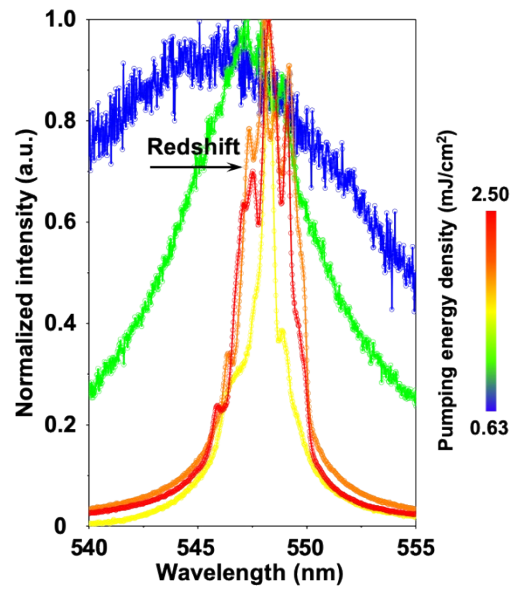

Fig. S4. Normalized red-shift emission spectrum of lasing mode under different pumping energy density.

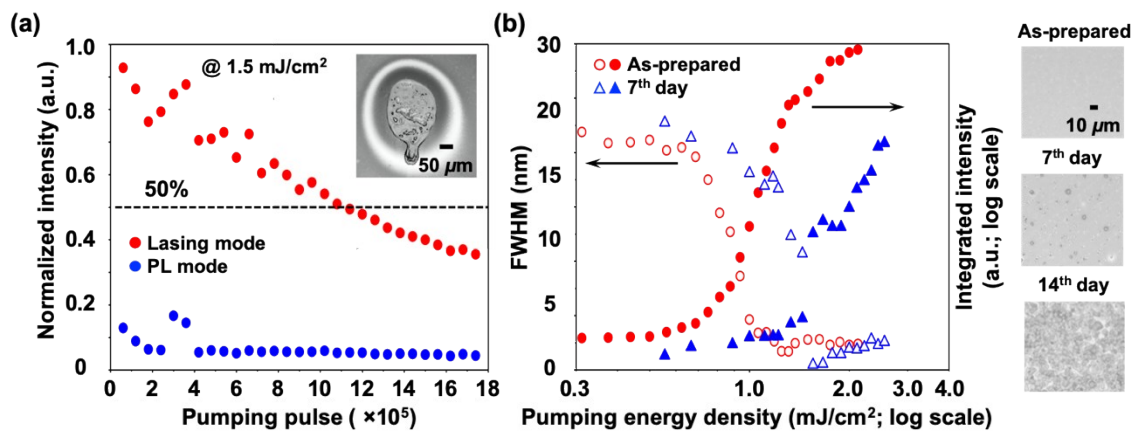

**Fig. S5. Reliability and lifetime test of synthesized MAPbBr<sub>3</sub> thin films. (a) Lasing reliability test under a series of pulsed pumping. Inset: Thermal damage on the film surface caused by the optical pumping fluence. (b) Lifetime test in ambient conditions without any sealing package. Inset: OM images of synthesized MAPbBr<sub>3</sub> perovskite bare films in ambient conditions without any sealing package.**
